# Supplementary material
Source: bioRxiv or medRxiv preprint supplement (https://www.biorxiv.org/highwire/filestream/101088/field_highwire_adjunct_files/13/324509-6.pdf)

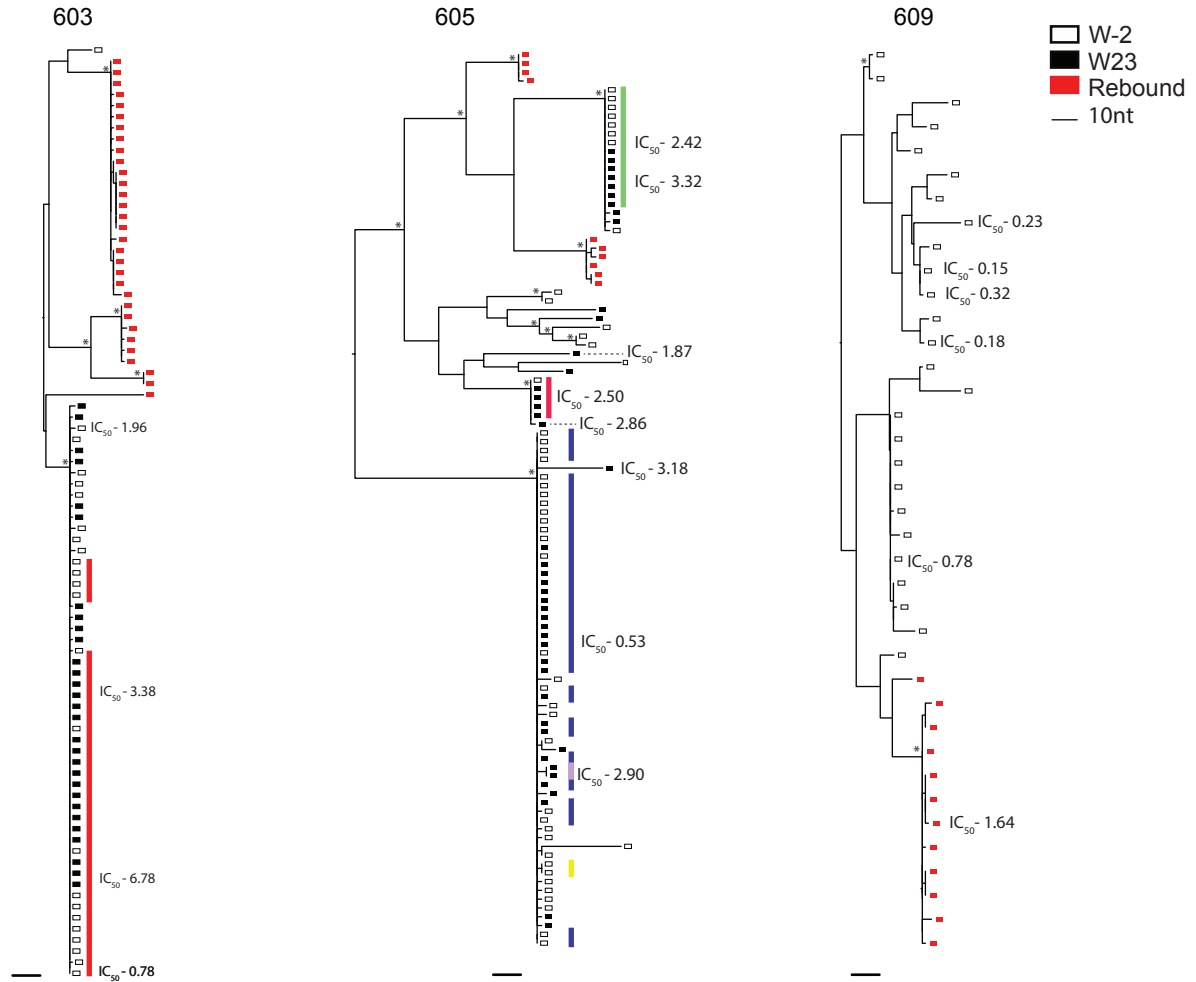

**Supplementary Figure 6. Env sequences from Q<sup>2</sup>VOA cultures and rebound SGA.**

Maximum likelihood phylogenetic trees of full-length *env* sequences of viruses from Q<sup>2</sup>VOA outgrowth cultures from the 6 participants not shown in Fig. 3. Viruses from week -2 are represented in empty black rectangles, week 23 in full black rectangles, and rebound SGA viruses in red rectangles. Asterisks indicate nodes with significant bootstrap values (bootstrap support  $\geq 90\%$ ). The color on the rectangles near the group of sequences defines the clones as shown in Fig.1c. Numbers correspond to 3BNC117 IC<sub>50</sub> neutralization values. For rebound viruses, neutralization values were determined from culture-derived viruses.

Supplementary Figure 6 continued.

608

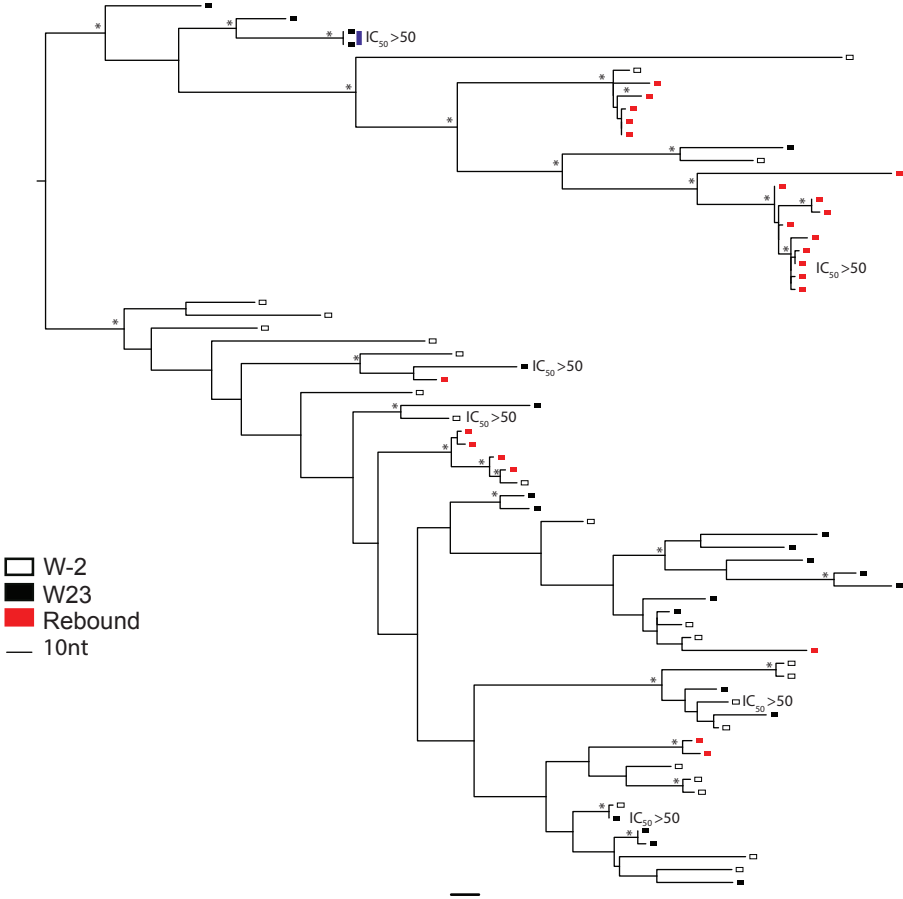

Supplementary Figure 6 continued.

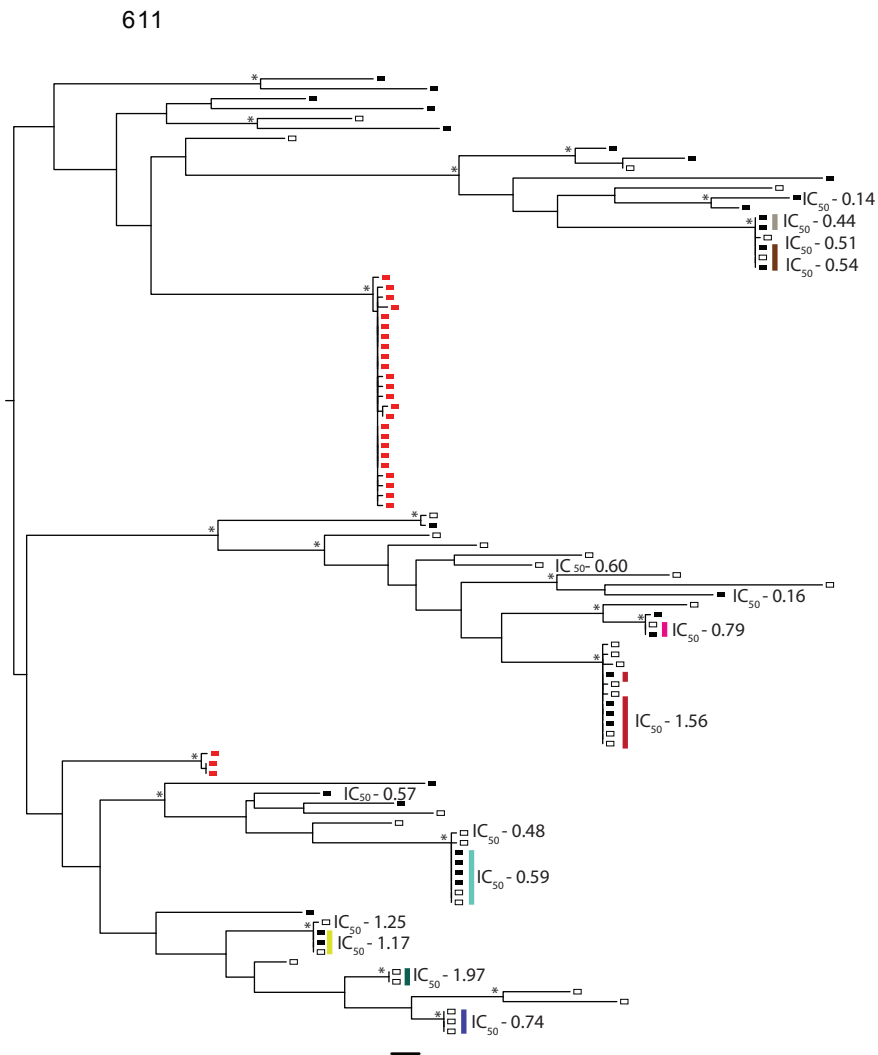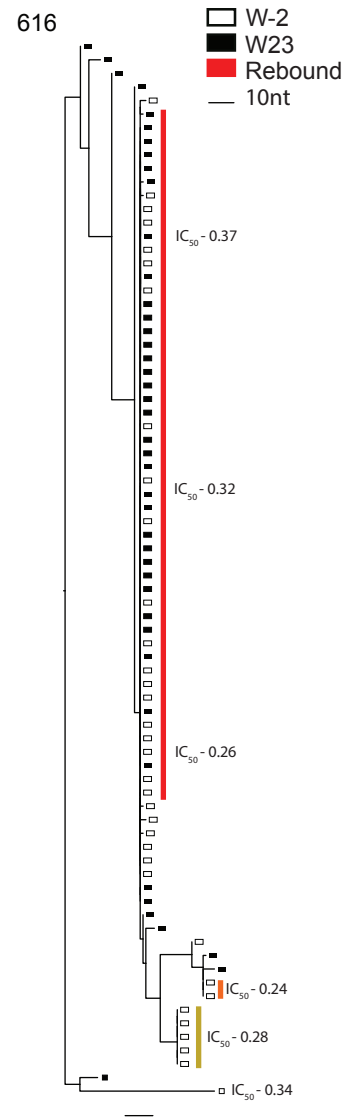

Supplement: Supplementary file [file 324509-6.pdf]
